# Supplementary material
Source: PubMed Central journal article supplement (PMC5339833)
Supplement: cr201712x4.pdf [file cr201712x4.pdf]

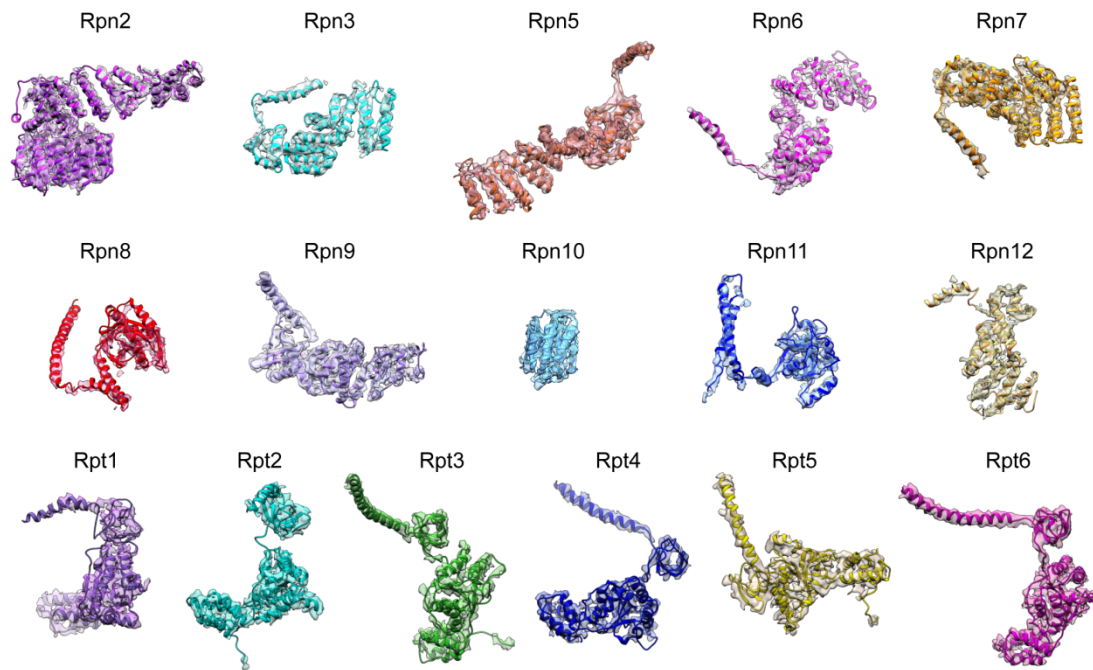

**Supplementary information, Figure S4** Pseudo atomic models of proteasome 19S RP subunits fitted into the cryo-EM map of proteasome-ADP-AIFx. Flexible fitted atomic models of the representative 19S subunits agree well with corresponding densities, with the secondary structural elements clearly seen. Rpn1 and Rpn13 are not shown here (reasons described in **Materials and Methods**).
