# Supplementary material
Source: PubMed Central journal article supplement (PMC5339833)
Supplement: cr201712x8.pdf [file cr201712x8.pdf]

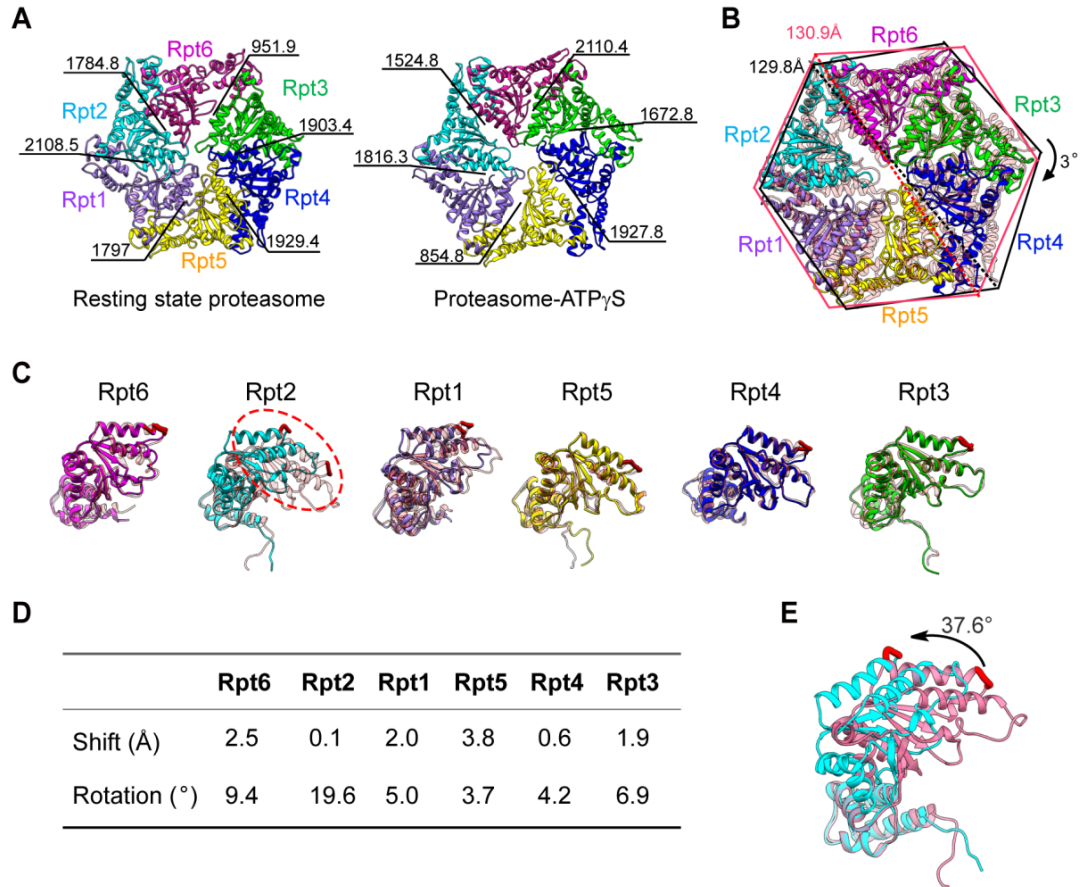

**Supplementary information, Figure S8** AAA-ATPase subunit interaction interface analysis and conformational changes of the AAA-ATPase ring from proteasome-ATP $\gamma$ S to proteasome-ADP-AIFx. **(A)** The AAA-ATPase ring of the resting state (left) and proteasome-ATP $\gamma$ S (right) structures. The interaction interface (in Å<sup>2</sup>) between the neighboring AAA domains is labeled. **(B)** Superposition of the AAA-rings of proteasome-ADP-AIFx (subunits in colors) and proteasome-ATP $\gamma$ S (salmon, PDB ID: 4CR4) [18] with respect to their 20S. The outer boundaries of the AAA-rings of proteasome-ATP $\gamma$ S and proteasome-ADP-AIFx are shown in black and red hexagons, respectively. A slight increase in radius (~1 Å) and a rotation (3°) can be observed from proteasome-ATP $\gamma$ S to proteasome-ADP-AIFx. **(C)** Aligned AAA domains of proteasome-ADP-AIFx (in color) and proteasome-ATP $\gamma$ S (transparent salmon) showing the position of Rpt2 (indicated by red circle) to differ the most between the two structures. **(D)** Alignment generated global shift and rotation between the two structures. **(E)** The enlarged view of the Rpt2

subunit inter domain rotation from proteasome-ATP $\gamma$ S to proteasome-ADP-AlF<sub>x</sub>,  
with the rotation angle and direction being labeled.
