# Supplementary material
Source: PubMed Central journal article supplement (PMC5339833)
Supplement: cr201712x11.pdf [file cr201712x11.pdf]

**Supplementary information, Table S1** Statistics of cryo-EM data collection and refinement.

|                                                 | <b>Proteasome-ADP-AIFx</b> | <b>Resting state proteasome</b> |
|-------------------------------------------------|----------------------------|---------------------------------|
| <b><i>Data collection</i></b>                   |                            |                                 |
| EM equipment                                    | Titan Krios                | Titan Krios                     |
| Voltage (kV)                                    | 300                        | 300                             |
| Detector                                        | K2 Summit                  | Falcon II                       |
| Pixel size (Å)                                  | 1.32                       | 1.09                            |
| Electron dose (e <sup>-</sup> /Å <sup>2</sup> ) | 38                         | 25                              |
| Exposure time (s)                               | 7.6                        | 1.1                             |
| Frames                                          | 38                         | 18                              |
| Defocus range (µm)                              | -1.8 to -2.5               | -1.8 to -2.5                    |
| <b><i>Reconstruction</i></b>                    |                            |                                 |
| Software                                        | RELION 1.3                 | RELION 1.3                      |
| Raw micrographs                                 | 13,871                     | 3,499                           |
| Final particles                                 | 178,576                    | 26,000                          |
| Symmetry                                        | C1                         | C1                              |
| Final resolution (Å)                            | 4.2                        | 6.3                             |
| Map-sharpening B factor (Å <sup>2</sup> )       | -127                       | -168                            |
| <b><i>Refinement</i></b>                        |                            |                                 |
| Software                                        | Rosetta                    | Rosetta                         |
| Rms deviations                                  |                            |                                 |
| Bond length (Å)                                 | 0.0037                     | 0.0035                          |
| Bond angle (°)                                  | 0.92                       | 0.92                            |
| Ramachandran plot statistics (%)                |                            |                                 |
| Preferred                                       | 93.29                      | 91.55                           |
| Allowed                                         | 6.54                       | 8.33                            |
| Outlier                                         | 0.17                       | 0.12                            |
